# Supplementary material for: Critical role of surface chemical modifications induced by length shortening on multi-walled carbon nanotubes-induced toxicity
Source: PubMed Central journal article supplement (PMC3515433; doi:10.1186/1743-8977-9-46), 2012-11-27

**Figure S4**

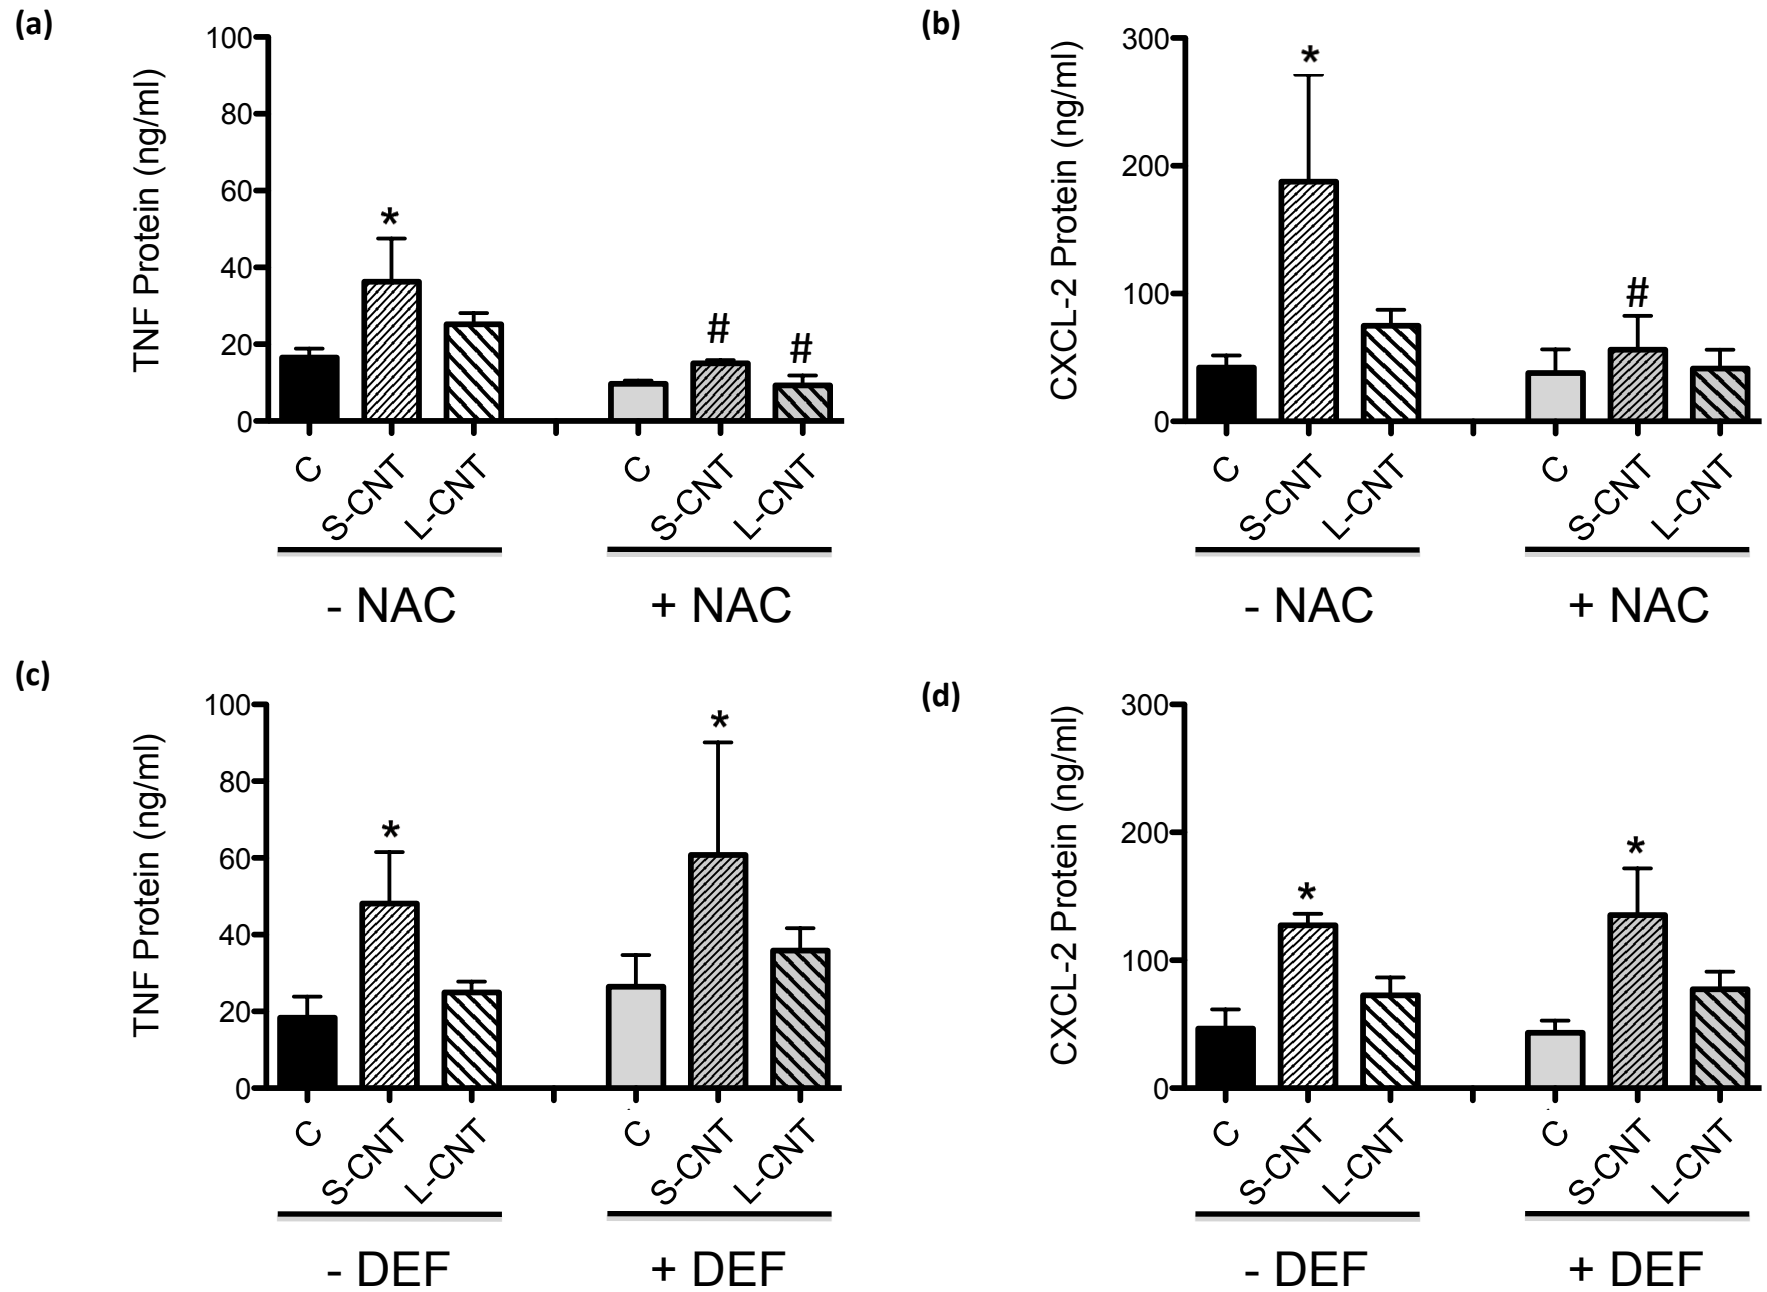

Supplement: 1743-8977-9-46-S4.pdf [file 1743-8977-9-46-S4.pdf]
